# Supplementary material
Source: ML conference proceedings conference paper supplement (https://openreview.net/forum?id=V_06QV-kZX)

$M = 16$ 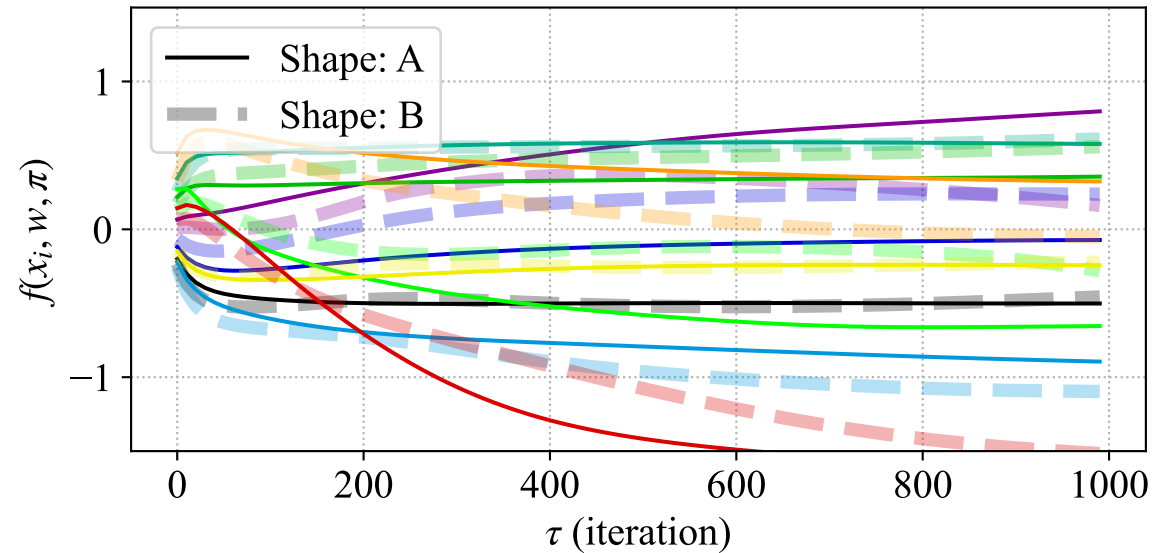 $M = 4096$ 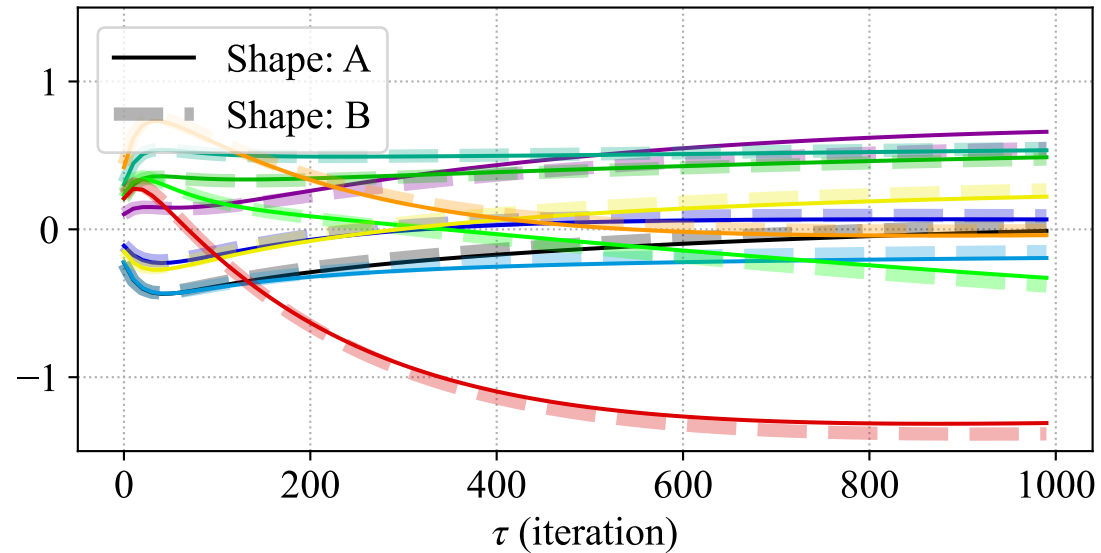

Supplement: supplementary_material [file attachment]
